# Supplementary material
Source: Springer Nature journal article supplement (https://www.springermedizin.de/resource/supplementary/12885_2008_1497_MOESM7_ESM.pdf/9472166)

normal

FEA

DCIS

IDC

PTEN

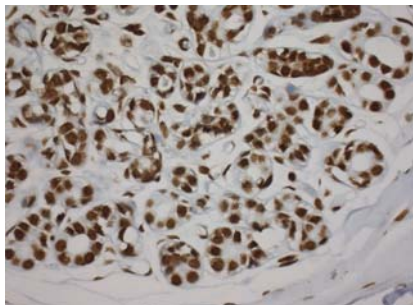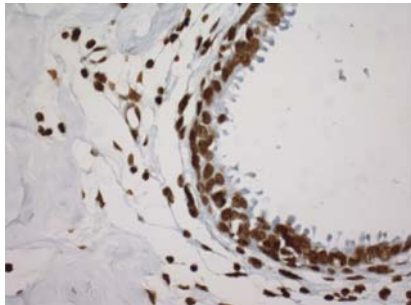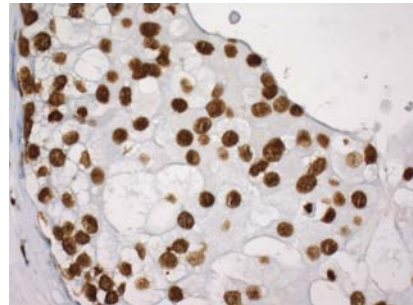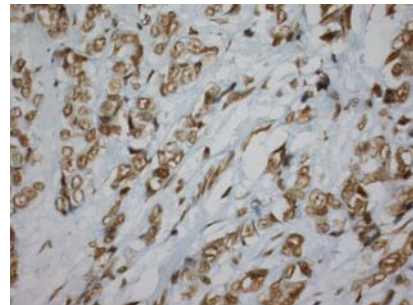

TM1

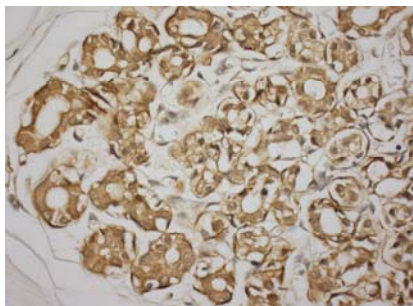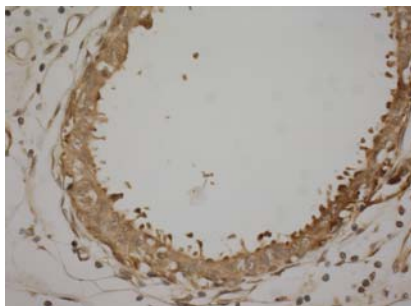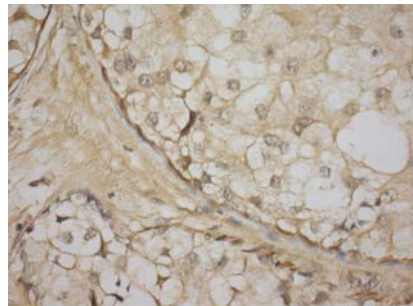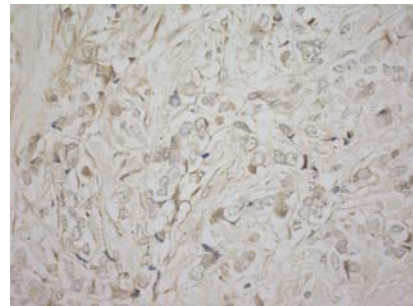

PDCD4

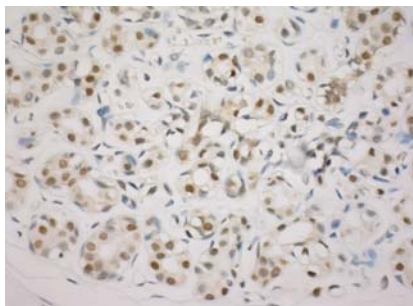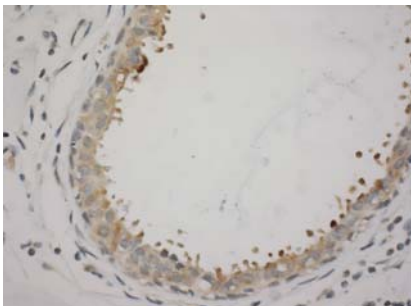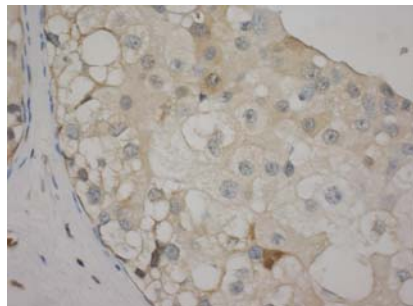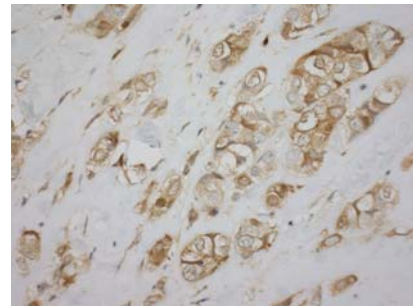

Supplement: MOESM7 [file 9472166]
